# Supplementary material
Source: publisher site journal article supplement (https://www.dovepress.com/article/608778)
Supplement: Supplementary file 1 [file Supplementary%20Document.docx]

**Table S1** Detailed scoring breakdown and consensus stability analysis (Supports Table 3)

| Procedure | Recommended Minimum Volume (case/ year) | Need Co-Surgeon (Median Score) | IQR |
| --- | --- | --- | --- |
| **Orthopedics** |  |  |  |
| ACL Reconstruction | 10 | 4 | 0 |
| Shoulder Rotator Cuff Repair | 5 | 4 | 1 |
| Primary Total Hip | 5 | 4 | 1 |
| Revision Total Hip | 1 | 5 | 0 |
| Primary Total Knee | 10 | 4 | 1 |
| Revision Total Knee | 1 | 5 | 1 |
| Fracture clavicle | 6 | 4 | 2 |
| Fracture proximal humerus | 6 | 4 | 1 |
| Fracture shaft of humerus | 4 | 4 | 1 |
| Fracture distal humerus | 5 | 5 | 1 |
| Fracture distal radius | 10 | 4 | 1 |
| Fracture neck of femur | 3 | 4 | 1 |
| Intertrochanteric fracture | 4 | 4 | 1 |
| Femoral shaft fracture | 4 | 4 | 1 |
| Distal femoral fracture | 3 | 5 | 1 |
| Type A | 3 |  |  |
| Type B | 3 |  |  |
| Type C | 1 |  |  |
| Patellar fracture | 3 | 4 | 1 |
| Fracture tibial plateau | 3 | 5 | 1 |
| Type A | 3 |  |  |
| Type B | 3 |  |  |
| Type C | 1 |  |  |
| Fracture of tibia shaft | 4 | 4 | 1 |
| Fracture of Distal tibia | 4 | 4 | 1 |
| Fracture ankle | 5 | 4 | 1 |
| Fracture of Talus | 3 | 5 | 1 |
| Fracture of Calcaneus | 4 | 5 | 1 |
| Intra-articular fracture | 3 |  |  |
| Extra-articular fracture | 1 |  |  |
| Fracture Acetabulum | 2 | 5 | 0 |
| Fracture Pelvis | 2 | 5 | 0 |
| Laminectomy or Posterior Lumbar Interbody Fusion (PLIF) | 4 | 5 | 1 |
| Cervical Fusion | 4 | 5 | 1 |
| Anterior Lumbar Interbody Fusion (ALIF) | 2 | 5 | 1 |
| Insertion of disc prosthesis: Cervical | 3 | 5 | 1 |
| Insertion of disc prosthesis: Thoracolumbar | 2 | 5 | 1 |
| Insertion of disc prosthesis: Lumbosacral region | 3 | 5 | 1 |
| Microscopic Discectomy | 7 | 5 | 1 |
| Kyphoplasty/ Vertebroplasty | 4 | 5 | 1 |
| Transforaminal Lumbar Interbody Fusion (TLIF) | 5 | 5 | 1 |
| Fracture Scapula | 2 | 5 | 1 |
| Distal Clavicle Fracture | 3 | 4 | 1 |
| Acromioclavicular (AC) Joint separation | 3 | 5 | 1 |
| External Fixation of the Pelvis | 2 | 3 | 2 |
| Fracture Scaphoid | 2 | 4 | 1 |
| Supracondylar Humerus fracture in children | 3 | 4 | 1 |
| Lateral condyle fracture in children | 2 | 4 | 1 |
| Medial epicondyle fracture in children | 1 | 4 | 1 |
| Radial Head and Neck fracture in children | 2 | 4 | 1 |
| Olecranon fracture in children | 1 | 4 | 2 |
| Monteggia Fracture-Dislocation in children | 2 | 4 | 1 |
| **OB-GYN** |  |  |  |
| Cesarean Delivery | 10 | 4 | 1.5 |
| Spontaneous Vaginal Delivery | 5 | 2 | 1.0 |
| Operative Vaginal Delivery | 3 | 2 | 2.0 |
| Vaginal Birth After Cesarean (VBAC) | 1 | 3 | 2.5 |
| Amniocentesis | 3 | NA | NA |
| Abdominal Hysterectomy | 6 | 4 | 1.0 |
| Laparoscopic Hysterectomy | 5 | 5 | 1.0 |
| Laparoscopic Ovarian Cystectomy | 5 | 4 | 1.0 |
| Exploratory Laparotomy for Ovarian Cystectomy | 4 | 4 | 2.0 |
| Open Myomectomy | 5 | 4 | 1.5 |
| Repair of Vaginal Enterocele | 1 | 4 | 1.5 |
| Repair of Cystocele and Rectocele | 2 | 4 | 1.0 |
| Sacrocolpopexy | 1 | 4 | 1.0 |
| Obstetric Ultrasound (Total) | 20 | NA | NA |
| *Level 1 Ultrasound* | 10 | NA | NA |
| *Level 2/3 Ultrasound* | 5 each | NA | NA |
| Transvaginal Ultrasound (GYN) | 20 | NA | NA |
| Hysteroscopy | 3 | 3 | 2.5 |
| Colposcopic Directed Biopsy | 5 | NA | NA |
| Manual Vacuum Aspiration (MVA) | 4 | 2 | 1.5 |
| Contraceptive Implant (Insertion/Removal) | 3 | NA | NA |
| IUD (Insertion/Removal) | 3 | NA | NA |
| Curettage / Fractional Curettage | 6 | NA | NA |

*Notes: Co-surgeon necessity was rated on a 5-point Likert scale (1 = Strongly Disagree, 5 = Strongly Agree). Bold text indicates medical specialties. Abbreviations: OB-GYN, Obstetrics and Gynecology; ACL, anterior cruciate ligament; PLIF, posterior lumbar interbody fusion; IQR, interquartile range; NA, not applicable.*

**Table S2** Extended quantitative validation and clinical incident correlation data (Supports Table 4)

| Procedure | Total (N) | Completion Status | n (Mean Occ rate ± SD) | P-Value |
| --- | --- | --- | --- | --- |
| **Orthopedics** |  |  |  |  |
| Anterior Cruciate Ligament (ACL) Reconstruction | 109 | Overall Status |  |  |
|  |  | Complete | 7 (0.07%±0.20%) | 0.061 *a* |
|  |  | Incomplete | 102 (1.96%±13.93%) |  |
|  |  | Years of Completion |  |  |
|  |  | High | 5 (0.10%±0.23%) | 0.058 *b* |
|  |  | Medium | 10 (0.00%±0.00%) |  |
|  |  | Low | 94(2.13%±14.51%) |  |
| Shoulder Rotator Cuff Repair | 82 | Overall Status |  |  |
|  |  | Complete | 13 (1.32%±2.56%) | ***<0.001 *a* |
|  |  | Incomplete | 69 (1.45%±12.04%) |  |
|  |  | Years of Completion |  |  |
|  |  | High | 7 (1.31%±2.06%) | ***<0.001 *b* |
|  |  | Medium | 19 (0.42%±1.84%) |  |
|  |  | Low | 56 (1.79%±13.36%) |  |
| Primary Total Hip | 129 | Overall Status |  |  |
|  |  | Complete | 14 (1.29%±2.58%) | 0.338 *a* |
|  |  | Incomplete | 115 (6.53%±22.56%) |  |
|  |  | Years of Completion |  |  |
|  |  | High | 9 (0.62%±1.85%) | 0.185 *b* |
|  |  | Medium | 14 (2.14%±3.58%) |  |
|  |  | Low | 106 (6.92%±23.44%) |  |
| Revision total hip | 32 | Overall Status |  |  |
|  |  | Complete | 15 (25.67%±37.17%) | 0.911 *a* |
|  |  | Incomplete | 17 (29.41%±46.97%) |  |
|  |  | Years of Completion |  |  |
|  |  | High | 2 (0.00%±0.00%) | 0.537 *b* |
|  |  | Medium | 13 (29.62%±38.54%) |  |
|  |  | Low | 17 (29.41%±46.97%) |  |
| Primary Total Knee | 153 | Overall Status |  |  |
|  |  | Complete | 16 (0.76%±2.21%) | 0.863 *a* |
|  |  | Incomplete | 137 (7.54%±22.03%) |  |
|  |  | Years of Completion |  |  |
|  |  | High | 12 (1.01%±2.53%) | 0.281 *b* |
|  |  | Medium | 17 (2.45%±3.68%) |  |
|  |  | Low | 124 (7.99%±23.08%) |  |
| Revision Total Knee | 8 | Overall Status |  |  |
|  |  | Complete | 3 (33.33%±57.74%) | 0.786 *a* |
|  |  | Incomplete | 5 (20.00%±44.72%) |  |
|  |  | Years of Completion |  |  |
|  |  | High | 0 |  |
|  |  | Medium | 3 (33.33%±57.74%) | 0.786 *b* |
|  |  | Low | 5 (20.00%±44.72%) |  |
| Fracture clavicle | 152 | Overall Status |  |  |
|  |  | Complete | 31 (0.14%±0.80%) | 0.179 *a* |
|  |  | Incomplete | 121 (4.92%±17.78%) |  |
|  |  | Years of Completion |  |  |
|  |  | High | 8 (0.00%±0.00%) | 0.467 *b* |
|  |  | Medium | 42 (0.51%±1.97%) |  |
|  |  | Low | 102 (5.67%±19.25%) |  |
| Fracture proximal humerus | 478 | Overall Status |  |  |
|  |  | Complete | 85 (0.07%±0.49%) | *0.027 *a* |
|  |  | Incomplete | 393(0.25%±5.04%) |  |
|  |  | Years of Completion |  |  |
|  |  | High | 33 (0.06%±0.32%) | 0.160 *b* |
|  |  | Medium | 116 (0.04%±0.39%) |  |
|  |  | Low | 329 (0.30%±5.51%) |  |
| Fracture shaft of humerus | 189 | Overall Status |  |  |
|  |  | Complete | 11 (0.00%±0.00%) | 0.724 *a* |
|  |  | Incomplete | 178 (0.39%±4.03%) |  |
|  |  | Years of Completion |  |  |
|  |  | High | 0 |  |
|  |  | Medium | 42 (0.00%±0.00%) | 0.448 *b* |
|  |  | Low | 147 (0.48%±4.43%) |  |
| Fracture distal humerus | 316 | Overall Status |  |  |
|  |  | Complete | 57 (0.00%±0.00%) | 0.506 *a* |
|  |  | Incomplete | 259 (0.26%±2.92%) |  |
|  |  | Years of Completion |  |  |
|  |  | High | 3 (0.00%±0.00%) | 0.906 *b* |
|  |  | Medium | 112 (0.30%±3.15%) |  |
|  |  | Low | 201 (0.17%±2.35%) |  |
| Fracture distal radius | 572 | Overall Status |  |  |
|  |  | Complete | 128 (0.00%±0.00%) | 0.591 *a* |
|  |  | Incomplete | 444 (0.08%±1.58%) |  |
|  |  | Years of Completion |  |  |
|  |  | High | 68 (0.00%±0.00%) | 0.787 *b* |
|  |  | Medium | 117 (0.00%±0.00%) |  |
|  |  | Low | 387 (0.09%±1.69%) |  |
| Fracture neck of femur | 300 | Overall Status |  |  |
|  |  | Complete | 63 (0.30%±1.77%) | 0.642 *a* |
|  |  | Incomplete | 237 (1.05%±9.33%) |  |
|  |  | Years of Completion |  |  |
|  |  | High | 28 (0.24%±1.26%) | 0.347 *b* |
|  |  | Medium | 104 (0.59%±3.00%) |  |
|  |  | Low | 168 (1.19%±10.88%) |  |
| Distal femoral fracture | 215 | Overall Status |  |  |
|  |  | Complete | 30 (0.00%±0.00%) | 0.568 *a* |
|  |  | Incomplete | 185 (0.81%±8.20%) |  |
|  |  | Years of Completion |  |  |
|  |  | High | 4 (0.00%±0.00%) | 0.584 *b* |
|  |  | Medium | 71 (0.00%±0.00%) |  |
|  |  | Low | 140 (1.071%±9.42%) |  |
| Patellar fracture | 33 | Overall Status |  |  |
|  |  | Complete | 2 (0.00%±0.00%) | 0.970 *a* |
|  |  | Incomplete | 31 (3.23%±17.96%) |  |
|  |  | Years of Completion |  |  |
|  |  | High | 0 |  |
|  |  | Medium | 2 (0.00%±0.00%) | 0.970 *a* |
|  |  | Low | 31 (3.23%±17.96%) |  |
| Fracture tibial plateau | 20 | Overall Status |  |  |
|  |  | Complete | 1 (0.00%±0.00%) | 0.800 *a* |
|  |  | Incomplete | 19 (18.42%±38.04%) |  |
|  |  | Years of Completion |  |  |
|  |  | High | 0 |  |
|  |  | Medium | 1 (0.00%±0.00%) | 0.800 *a* |
|  |  | Low | 19 (18.42%±38.04%) |  |
| Fracture of Distal tibia | 318 | Overall Status |  |  |
|  |  | Complete | 52 (0.11%±0.82%) | 0.431 *a* |
|  |  | Incomplete | 266(0.17%±2.18%) |  |
|  |  | Years of Completion |  |  |
|  |  | High | 14 (0.00%±0.00%) | 0.284 *b* |
|  |  | Medium | 84 (0.22%±1.50%) |  |
|  |  | Low | 220 (0.15%±2.25%) |  |
| Acetabulum | 69 | Overall Status |  |  |
|  |  | Complete | 10 (0.00%±0.00%) | 0.189 *a* |
|  |  | Incomplete | 59 (14.41%±34.80%) |  |
|  |  | Years of Completion |  |  |
|  |  | High | 6 (0.00%±0.00%) | 0.066 *b* |
|  |  | Medium | 18 (0.00%±0.00%) |  |
|  |  | Low | 45 (18.89%±38.86%) |  |
| Pelvis | 45 | Overall Status |  |  |
|  |  | Complete | 6 (2.08%±5.10%) | 0.961 *a* |
|  |  | Incomplete | 39 (12.82%±33.87%) |  |
|  |  | Years of Completion |  |  |
|  |  | High | 4 (3.13%±6.25%) | 0.322 *b* |
|  |  | Medium | 11 (0.00%±0.00%) |  |
|  |  | Low | 30 (16.67%±37.90%) |  |
| Laminectomy or Posterior Lumbar Interbody Fusion (PLIF) | 78 | Overall Status |  |  |
|  |  | Complete | 16 (0.45%±1.79%) | 0.930 *a* |
|  |  | Incomplete | 62 (3.63%±15.58%) |  |
|  |  | Years of Completion |  |  |
|  |  | High | 4 (0.00%±0.00%) | 0.631 *b* |
|  |  | Medium | 26(0.27%±1.40%) |  |
|  |  | Low | 48 (4.69%±17.61%) |  |
| Cervical Fusion | 77 | Overall Status |  |  |
|  |  | Complete | 21 (0.00%±0.00%) | 0.283 *a* |
|  |  | Incomplete | 56 (2.08%±9.57%) |  |
|  |  | Years of Completion |  |  |
|  |  | High | 10 (0.00%±0.00%) | 0.790 *b* |
|  |  | Medium | 20 (0.83%±3.73%) |  |
|  |  | Low | 47 (2.13%±10.20%) |  |
| Anterior Lumbar Interbody Fusion (ALIF) | 6 | Overall Status |  |  |
|  |  | Complete | 2 (0.00%±0.00%) | 0.800 *a* |
|  |  | Incomplete | 4 (25.00%±50.00%) |  |
|  |  | Years of Completion |  |  |
|  |  | High | 0 | 0.800 *a* |
|  |  | Medium | 2 (0.00%±0.00%) |  |
|  |  | Low | 4 (25.00%±50.00%) |  |
| Insertion of disc prosthesis : Cervical | 16 | Overall Status |  |  |
|  |  | Complete | 1 (0.00%) | 0.750 *a* |
|  |  | Incomplete | 15 (30.00%) |  |
|  |  | Years of Completion |  |  |
|  |  | High | 1 (0.00%±0.00%) | 0.463 *b* |
|  |  | Medium | 2 (0.00%±0.00%) |  |
|  |  | Low | 13 (34.62%±47.37%) |  |
| Microscopic Discectomy | 147 | Overall Status |  |  |
|  |  | Complete | 28 (0.07%±0.36%) | 0.269 *a* |
|  |  | Incomplete | 119 (0.14%±1.53%) |  |
|  |  | Years of Completion |  |  |
|  |  | High | 16 (0.12%±0.47%) | 0.194 *b* |
|  |  | Medium | 29 (0.00%±0.00%) |  |
|  |  | Low | 102 (0.16%±1.65%) |  |
| Kyphoplasty/ Vertebroplasty | 40 | Overall Status |  |  |
|  |  | Complete | 7 (0.00%±0.00%) | 0.917 *a* |
|  |  | Incomplete | 33 (0.76%±4.35%) |  |
|  |  | Years of Completion |  |  |
|  |  | High | 2 (0.00%±0.00%) | 0.741 *b* |
|  |  | Medium | 13 (0.00%±0.00%) |  |
|  |  | Low | 25 (1.00%±5.00%) |  |
| Transforaminal Lumbar Interbody Fusion (TLIF) | 113 | Overall Status |  |  |
|  |  | Complete | 38 (0.00%±0.00%) | 0.312 *a* |
|  |  | Incomplete | 75 (2.67%±16.22%) |  |
|  |  | Years of Completion |  |  |
|  |  | High | 18 (0.00%±0.00%) | 0.475 *b* |
|  |  | Medium | 30 (0.00%±0.00%) |  |
|  |  | Low | 65 (3.08%±17.40%) |  |
| Fracture Scapula | 199 | Overall Status |  |  |
|  |  | Complete | 43 (0.00%±0.00%) | 0.600 *a* |
|  |  | Incomplete | 156 (0.32%±4.00%) |  |
|  |  | Years of Completion |  |  |
|  |  | High | 1 (0.00%±0.00%) | 0.699 *b* |
|  |  | Medium | 116 (0.43%±4.64%) |  |
|  |  | Low | 82 (0.00%±0.00%) |  |
| Olecranon fracture in children | 221 | Overall Status |  |  |
|  |  | Complete | 129 (0.00%±0.00%) | 0.236 *a* |
|  |  | Incomplete | 92 (0.54%±5.21%) |  |
|  |  | Years of Completion |  |  |
|  |  | High | 0 |  |
|  |  | Medium | 221 (0.23%±3.36%) |  |
|  |  | Low | 0 |  |
| **OB-GYN** |  |  |  |  |
| Cesarean Delivery | 440 | Overall Status |  |  |
|  |  | Complete | 168 (0.07%±0.33%) | ***<0.001 *a* |
|  |  | Incomplete | 272 (0.07%±1.10%) |  |
|  |  | Years of Completion |  |  |
|  |  | High | 78 (0.01%±0.11%) | ***<0.001 *b* |
|  |  | Medium | 143 (0.08%±0.35%) |  |
|  |  | Low | 219(0.08±1.23%) |  |
| Spontaneous Vaginal Delivery | 121 | Overall Status |  |  |
|  |  | Complete | 19 (0.40±1.23%) | 0.768 *a* |
|  |  | Incomplete | 102 (10.23%±29.94%) |  |
|  |  | Years of Completion |  |  |
|  |  | High | 0 | 0.788 *a* |
|  |  | Medium | 27 (0.65%±2.14%) |  |
|  |  | Low | 94 (10.99%±31.07%) |  |
| Operative Vaginal Delivery | 53 | Overall Status |  |  |
|  |  | Complete | 4 (0.00%±0.00%) | 0.758 *a* |
|  |  | Incomplete | 49 (8.50%±27.66%) |  |
|  |  | Years of Completion |  |  |
|  |  | High | 0 | 0.818 *a* |
|  |  | Medium | 12 (1.39%±4.81%) |  |
|  |  | Low | 41(9.76%±30.04%) |  |
| Abdominal Hysterectomy | 321 | Overall Status |  |  |
|  |  | Complete | 64 (0.00%±0.00%) | 0.154 *a* |
|  |  | Incomplete | 257 (1.61%±10.38) |  |
|  |  | Years of Completion |  |  |
|  |  | High | 29 (0.00%±0.00%) | 0.129 *b* |
|  |  | Medium | 78 (0.00%±0.00%) |  |
|  |  | Low | 214 (1.92%±11.35%) |  |
| Laparoscopic Hysterectomy | 194 | Overall Status |  |  |
|  |  | Complete | 64 (0.11%±0.72%) | 0.074 *a* |
|  |  | Incomplete | 130 (0.11±1.25%) |  |
|  |  | Years of Completion |  |  |
|  |  | High | 32 (0.06%±0.27) | 0.189 *b* |
|  |  | Medium | 56 (0.10%±0.74) |  |
|  |  | Low | 106 (0.14%±1.39) |  |
| Laparoscopic ovarian cystectomy | 197 | Overall Status |  |  |
|  |  | Complete | 44 (0.00%±0.00%) | 0.351 *a* |
|  |  | Incomplete | 153 (0.27%±1.95%) |  |
|  |  | Years of Completion |  |  |
|  |  | High | 20 (0.00%±0.00%) |  |
|  |  | Medium | 57 (0.44%±2.32%) | 0.343 *b* |
|  |  | Low | 120 (0.14%±1.52%) |  |
| Explore lap for ovarian cystectomy | 94 | Overall Status |  |  |
|  |  | Complete | 9 (0.00%±0.00%) | 0.745 *a* |
|  |  | Incomplete | 85 (0.24%±2.17%) |  |
|  |  | Years of Completion |  |  |
|  |  | High | 0 | 0.592 *a* |
|  |  | Medium | 21 (0.00%±0.00%) |  |
|  |  | Low | 73 (0.27%±2.34%) |  |
| Open Myomectomy | 271 | Overall Status |  |  |
|  |  | Complete | 73 (0.02%±0.20%) | 0.465 *a* |
|  |  | Incomplete | 198(0.05%±0.71%) |  |
|  |  | Years of Completion |  |  |
|  |  | High | 40 (0.04%±0.27%) | 0.158 *b* |
|  |  | Medium | 59 (0.17%±1.30) |  |
|  |  | Low | 172 (0.00%±0.00%) |  |
| Manual Vacuum Aspiration (MVA) | 227 | Overall Status |  |  |
|  |  | Complete | 58 (0.04%±0.29) | 0.724 *a* |
|  |  | Incomplete | 169 (0.00%±0.00%) |  |
|  |  | Years of Completion |  |  |
|  |  | High | 12 (0.00%±0.00%) |  |
|  |  | Medium | 86 (0.03%±0.23%) | 0.448 *b* |
|  |  | Low | 129 (0.00%±0.00%) |  |
| Abortion | 332 | Overall Status |  |  |
|  |  | Complete | 88 (0.00%±0.00%) | 0.395*a* |
|  |  | Incomplete | 244 (0.53%±6.65%) |  |
|  |  | Years of Completion |  |  |
|  |  | High | 25 (0.00%±0.00%) | 0.901*b* |
|  |  | Medium | 131 (0.22%±2.50%) |  |
|  |  | Low | 176 (0.57%±7.54%) |  |

*Notes: Bold text indicates medical specialties. Abbreviations : OB-GYN, Obstetrics and Gynecology; Occ Rate, Occurrence Rate of adverse clinical incidents. a: Mann-Whitney U Test; b: Kruskal-Wallis Test. Significant levels: * p < 0.05, *** p < 0.001.*
